# Supplementary material for: Implementing a Multifaceted Intervention among Internal Medicine Residents with Audit and Educative Data Feedback Significantly Reduces Low-Value Care in Hospitalized Patients
Source: MDPI journal article supplement (doi:10.3390/jcm11092435), 2022-04-26
Supplement: s1 [file s1]

# Réduire le nombre d'examens de laboratoire

## Le saviez-vous ?

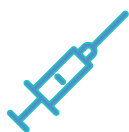

De nombreux examens de laboratoire sont demandés à intervalles réguliers (parfois quotidiennement)

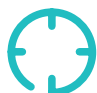

Un examen de laboratoire devrait être demandé uniquement pour répondre à une question clinique précise

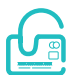

La prescription régulière des tests augmente les coûts de la santé, ne profite pas aux patients et peut leur nuire

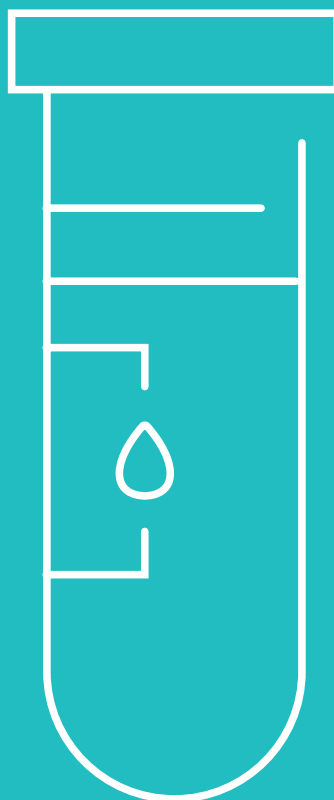

## Complications

Coûts

Anémie

Prolongation du séjour hospitalier

Examens complémentaires secondaires inutiles
