# Supplementary material for: Implementing a Multifaceted Intervention among Internal Medicine Residents with Audit and Educative Data Feedback Significantly Reduces Low-Value Care in Hospitalized Patients
Source: MDPI journal article supplement (doi:10.3390/jcm11092435), 2022-04-26
Supplement: s1 [file s1]

# Réduire l'utilisation des benzodiazépines

## Le saviez-vous ?

20 – 30 %

Les benzodiazépines sont trop  
souvent prescrites en milieu  
hospitalier

Les indications appropriées  
sont rares (sevrage OH, trouble  
anxieux, soins palliatifs)

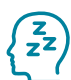

Les benzodiazépines doivent  
être évitées pour les troubles du  
sommeil

Il existe des alternatives pour  
les troubles du sommeil  
[mélatonine, hygiène de  
sommeil, réduction des  
nuisances sonores]

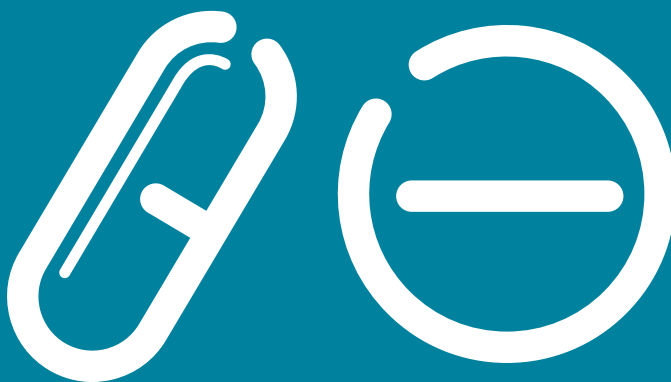

## Complications

Chute

Fracture

Prolongation du séjour hospitalier

Dépendance

Dépression respiratoire
