# Supplementary material for: Implementing a Multifaceted Intervention among Internal Medicine Residents with Audit and Educative Data Feedback Significantly Reduces Low-Value Care in Hospitalized Patients
Source: MDPI journal article supplement (doi:10.3390/jcm11092435), 2022-04-26
Supplement: s1 [file s1]

# Revoir la poursuite d'un traitement à long terme d'inhibiteurs de la pompe à protons

## Le saviez-vous ?

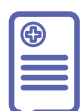

Les inhibiteurs de la pompe à protons (IPP) comptent parmi les médicaments les plus souvent prescrits

50%

Dans plus de 50% des cas, cette prescription est inappropriée

Les inhibiteurs de la pompe à protons sont associés à des effets secondaires non négligeables

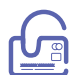

L'impact sur les coûts de la santé est important

## Effets secondaires reconnus

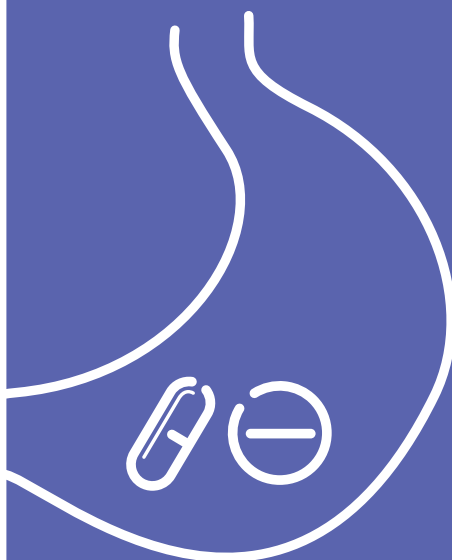

Fracture des os

Effet rebond à l'arrêt du traitement

Maladies rénales chroniques

Pneumonies

Diarrhées infectieuses

Carences en Calcium, Magnésium, vitamine B12 et en Fer

## Mauvaises indications

- » Traitement prolongé de reflux sans essai de sevrage
- » Prévention ulcère chez patient sous cortisone ou sous AINS sans facteur de risque
- » Prévention ulcère de stress à l'étage
