# Supplementary material for: Implementing a Multifaceted Intervention among Internal Medicine Residents with Audit and Educative Data Feedback Significantly Reduces Low-Value Care in Hospitalized Patients
Source: MDPI journal article supplement (doi:10.3390/jcm11092435), 2022-04-26
Supplement: s1 [file s1]

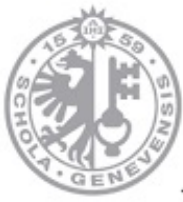

**UNIVERSITÉ  
DE GENÈVE**

**FACULTÉ DE MÉDECINE**

**smartermedicine**

Choosing Wisely Switzerland

# Module E-learning

**Inhibiteurs de la pompe à protons**

**Version 1.0 3.01.2021**

**Commencer**

# Introduction

- Les inhibiteurs de la pompe à protons (IPP) sont très souvent prescrits
- Les indications reconnues au long terme sont réduites
- La prescription au long terme est non seulement inutile mais est associée à des potentiels préjudices.

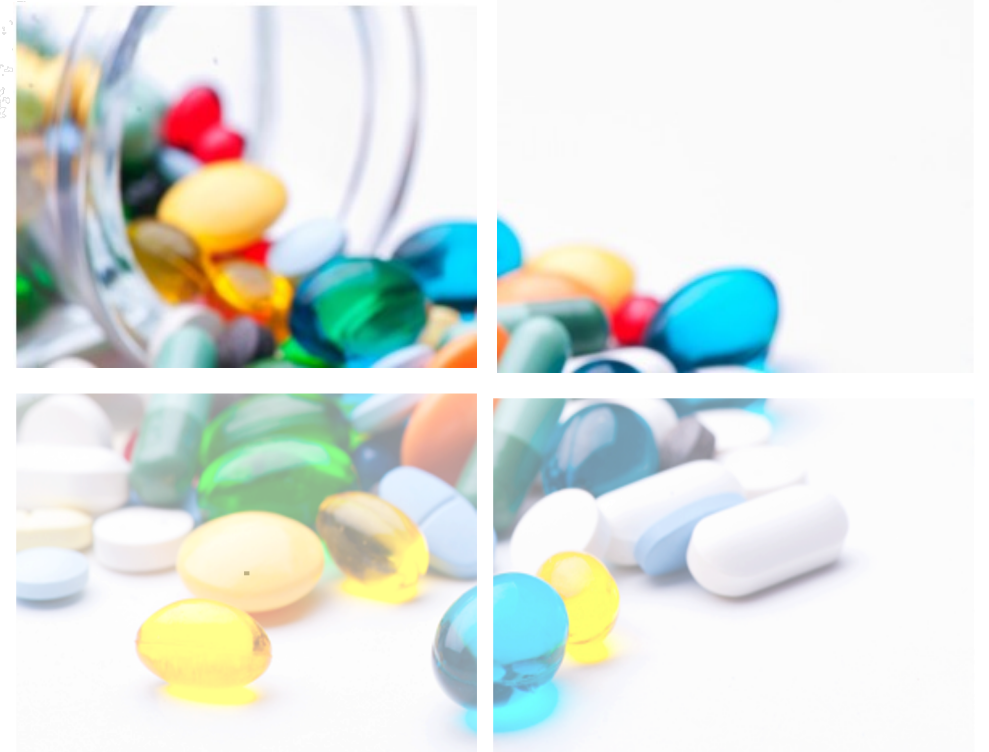

# Différents type d'IPP disponibles sur le marché

## PPI Availability

| PPI                                       | Standard dose (healing) (once daily)* | Low dose (maintenance) (once daily) |
|-------------------------------------------|---------------------------------------|-------------------------------------|
| Omeprazole (Losec®) - Capsule             | 20 mg <sup>+</sup>                    | 10 mg <sup>+</sup>                  |
| Esomeprazole (Nexium®) - Tablet           | 20 <sup>a</sup> or 40 <sup>b</sup> mg | 20 mg                               |
| Lansoprazole (Prevacid®) - Capsule        | 30 mg <sup>+</sup>                    | 15 mg <sup>+</sup>                  |
| Dexlansoprazole (Dexilant®) - Tablet      | 30 <sup>c</sup> or 60 <sup>d</sup> mg | 30 mg                               |
| Pantoprazole (Tecta®, Pantoloc®) - Tablet | 40 mg                                 | 20 mg                               |
| Rabeprazole (Pariet®) - Tablet            | 20 mg                                 | 10 mg                               |

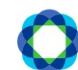

«Principaux  
médicaments  
utilisés dans  
les hôpitaux  
Suisse

| Number of prescriptions | Most frequent used products by trade-names (®)    | IT code  |
|-------------------------|---------------------------------------------------|----------|
| 3341                    | Saline 0.9%, ringer-lactate, glucose 5 %          | 05.03.20 |
| 2943                    | Paracetamol                                       | 01.01.10 |
| 2037                    | Morphine, Fentanyl, Pethidin                      | 01.01.30 |
| 1795                    | Nadroparin                                        | 06.03.30 |
| 1772                    | Esomeprazol, Omeprazol                            | 04.99.00 |
| 1691                    | Torsemid, Furosemid                               | 05.01.00 |
| 1456                    | Sodium-picosulfate, Sodium-dihydrogenophosphate   | 04.08.11 |
| 1245                    | Quinapril, Valsartan                              | 02.07.10 |
| 1216                    | Amoxicillin, Cotrimoxazol, Piperacilin Tazobactam | 08.01.93 |
| 1153                    | Acetylsalicylic acid                              | 06.03.20 |
| 1121                    | Lorazepam                                         | 01.04.10 |
| 885                     | Valerian extract                                  | 01.04.20 |
| 847                     | Salbutamol, Ipratropiumbromide                    | 03.04.30 |
| 671                     | Atorvastatin                                      | 07.12.00 |
| 667                     | Bisoprolol, Metoprolol                            | 02.03.00 |
| 643                     | Ciprofloxacin, Moxifloxacin                       | 08.01.80 |
| 614                     | Zolpidem, Midazolam, Triazolam                    | 01.30.10 |
| 560                     | Felodipin, Amlodipin                              | 02.06.10 |
| 535                     | Metformin, Gliclazid, Pioglitazon                 | 07.06.20 |
| 463                     | Phenprocoumon                                     | 06.03.10 |
| 459                     | Acetylcystein                                     | 03.02.00 |
| 423                     | Citalopram, Paroxetin, Clomipramin                | 01.06.00 |
| 335                     | Dexpanthenol                                      | 12.02.40 |
| 334                     | Cefepime                                          | 08.01.30 |
| 312                     | Sacharmyces                                       | 04.09.00 |

# Indications reconnues aux IPP

Dans certaines situations cliniques, les IPP sont indiqués au long cours (>8sem).

**Q.2: Quels sont selon vous ces situations?**

*Cliquez sur la/les bonne(s) réponse(s). Plusieurs réponses possibles*

Œsophagite  
sévère

Ulcère aux AINS

Œsophage de  
Barrett

En prévention  
chez patients à  
risque sous AINS

Cliquez sur les bonnes  
réponses

# Indications reconnues aux IPP

Dans certaines situations cliniques, les IPP sont indiqués au long cours (>8sem).

**Q.2: Quels sont selon vous ces situations?**

*Cliquez sur la/les bonne(s) réponse(s). Plusieurs réponses possibles*

**Œsophagite  
sévère**

**Ulcère aux AINS**

**Œsophage de  
Barrett**

**En prévention  
chez patients à  
risque sous AINS**

**Cliquez sur les bonnes  
réponses**



# Savoir reconnaître les indications appropriées aux IPP

**Table 1** Summary of the conclusions by Scarpignato et al. [3] regarding the appropriateness of proton pump inhibitor (PPI) therapy in 13 clinical scenarios of uncertainty and common misuse

|                                                           | Reason for use                                                                                                                                                                                                                                                                                                                                                                                                                                                                                                                                                                                                                                                                                                                                                                                                                                                                                                            |
|-----------------------------------------------------------|---------------------------------------------------------------------------------------------------------------------------------------------------------------------------------------------------------------------------------------------------------------------------------------------------------------------------------------------------------------------------------------------------------------------------------------------------------------------------------------------------------------------------------------------------------------------------------------------------------------------------------------------------------------------------------------------------------------------------------------------------------------------------------------------------------------------------------------------------------------------------------------------------------------------------|
| Long-term PPI therapy appropriate                         | <ul style="list-style-type: none"> <li>• Barrett's esophagus</li> <li>• Healing and maintenance of healed Los Angeles grade C or D erosive esophagitis<sup>a</sup></li> <li>• PPI-responsive esophageal eosinophilia</li> <li>• Idiopathic (<i>H. pylori</i> and NSAID/aspirin negative) peptic ulcer disease</li> <li>• Zollinger–Ellison disease<sup>a,b</sup></li> <li>• PPI-responsive GERD/non-erosive reflux disease<sup>a,c</sup></li> <li>• Long-term non-selective NSAID users at high-risk for upper GI complications or long-term cox-2 inhibitor users with a prior episode of GI bleeding<sup>a</sup></li> <li>• Anti-platelet therapy in patients at high-risk for upper GI complications (age &gt; 65 years or concomitant use of corticosteroids or anticoagulants or history of peptic ulcer disease)</li> <li>• Steatorrhea refractory to enzyme replacement therapy in chronic pancreatitis</li> </ul> |
| Short-term PPI therapy appropriate (4- to 12-week course) | <ul style="list-style-type: none"> <li>• Healing of Los Angeles grade A or B erosive esophagitis<sup>a</sup></li> <li>• Eosinophilic esophagitis</li> <li>• <i>H. pylori</i> eradication (in combination with antibiotics)<sup>a,d</sup></li> <li>• Stress ulcer prophylaxis in high-risk patients (i.e., critically ill patients with respiratory failure or coagulopathy)</li> <li>• Functional dyspepsia</li> <li>• Treatment and maintenance of peptic ulcer disease<sup>a</sup></li> <li>• Prior to endoscopy for acute upper GI bleeding</li> <li>• Following endoscopic treatment of a high-risk ulcer GI bleed</li> </ul>                                                                                                                                                                                                                                                                                         |
| PPI use not appropriate                                   | <ul style="list-style-type: none"> <li>• Corticosteroid users without concomitant NSAID therapy</li> <li>• To prevent bleeding from hypertensive gastropathy in cirrhotic patients</li> <li>• Acute pancreatitis</li> <li>• Stress ulcer prophylaxis in non-critically ill hospitalized patients that are not at high-risk for ulcer formation and GI bleeding</li> </ul>                                                                                                                                                                                                                                                                                                                                                                                                                                                                                                                                                 |
| PPI use of uncertain benefit                              | <ul style="list-style-type: none"> <li>• PPI non-responsive GERD</li> <li>• Extra-digestive GERD</li> </ul>                                                                                                                                                                                                                                                                                                                                                                                                                                                                                                                                                                                                                                                                                                                                                                                                               |

<sup>a</sup>FDA approved indications

<sup>b</sup>Requires 3–4 times the usual dose (PPI therapy is typically started as single dose)

<sup>c</sup>In these cases, a PPI taper should be attempted to the lowest effective dose, on demand dosing, or intermittent dosing

<sup>d</sup>In this case, a 1 to 2 week course of PPI therapy for *H. pylori* eradication in conjunction with antibiotics is appropriate  
GERD gastroesophageal reflux disease, GI gastrointestinal, NSAID non-steroidal anti-inflammatory drugs

# Indications reconnues des IPP

Reflux gastro-  
eosophagien  
(GERD/NERD)

Hémorragie  
digestive haute

Prévention  
ulcère  
NSAID/AAS

## Long terme

- Oesophagite sévère ou Barrett
- Persistance des symptômes:
  - Maintenir la dose minimale efficace
  - Traitement à la demande

- **Court terme:** haut risque → haute dose 72h
- **Moyen terme:**
  - Ulcère duodénal/estomac
    - IPP 4-8 sem **dose standard**
- **Varice oesophagienne** IPP 10j dose standard

Rockall >6 =  
double dose 11 jours  
puis

dose standard

- IPP si risque élevé (atcd ulcère ou  $\geq 3$  facteurs de risque)
- Pas besoin IPP si corticoïde uniquement

## Facteurs de risque

Age >65 ans  
Haute dose AINS  
Prise concomitante (AAS, antiplaquettaire, Cortisone, ACO, SSRI?)



# Complications des IPP

Quels sont les effets secondaires associés avec la prescription des IPP

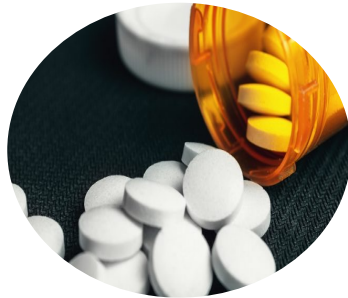

**Addiction**

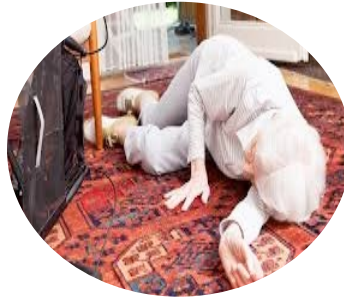

**Fracture**

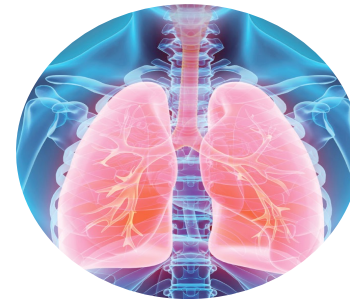

**Colite infectieuse**

Choisissez la bonne réponse

**Valider**

# Complications des IPP

Quels sont les effets secondaires associés avec la prescription des IPP



Addiction



Fracture



Colite infectieuse

Choisissez la bonne réponse

Valider

# Complications des IPP au long cours

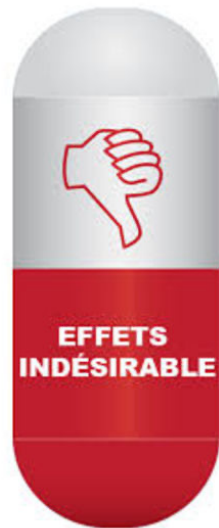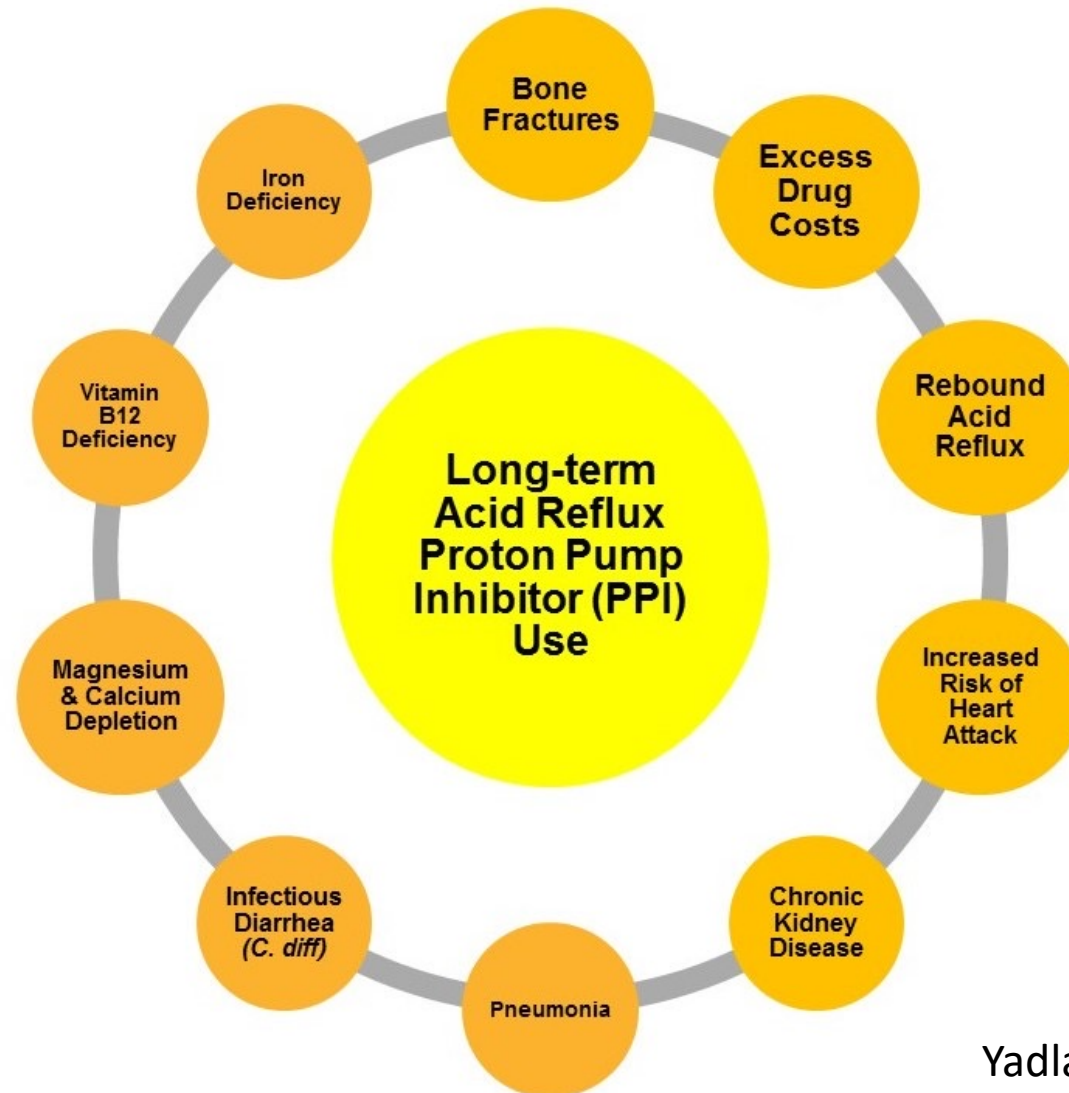

# Safety of Proton Pump Inhibitors Based on a Large, Multi-Year, Randomized Trial of Patients Receiving Rivaroxaban or Aspirin

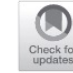

Paul Moayyedi,<sup>1</sup> John W. Eikelboom,<sup>1</sup> Jackie Bosch,<sup>1</sup> Stuart J. Connolly,<sup>1</sup> Leanne Dyal,<sup>1</sup>

**Table 3.** Other Prespecified Safety Outcomes

| Outcome                      | Incident events, n (%)            |                    | Pantoprazole, 40 mg od, vs placebo |         |
|------------------------------|-----------------------------------|--------------------|------------------------------------|---------|
|                              | Pantoprazole, 40 mg od (n = 8791) | Placebo (n = 8807) | OR (95% CI)                        | P value |
| Gastric atrophy              | 19 (0.2)                          | 26 (0.3)           | 0.73 (0.40–1.32)                   | .30     |
| <i>Clostridium difficile</i> | 9 (0.1)                           | 4 (<0.1)           | 2.26 (0.70–7.34)                   | .18     |
| Other enteric infection      | 119 (1.4)                         | 90 (1.0)           | 1.33 (1.01–1.75)                   | .04     |
| Chronic kidney disease       | 184 (2.1)                         | 158 (1.8)          | 1.17 (0.94–1.45)                   | .15     |
| Dementia                     | 55 (0.6)                          | 46 (0.5)           | 1.20 (0.81–1.78)                   | .36     |
| Pneumonia                    | 318 (3.6)                         | 313 (3.6)          | 1.02 (0.87–1.19)                   | .82     |
| Fracture                     | 203 (2.3)                         | 211 (2.4)          | 0.96 (0.79–1.17)                   | .71     |
| COPD                         | 146 (1.7)                         | 124 (1.4)          | 1.18 (0.93–1.51)                   | .17     |
| Diabetes mellitus            | 513 (5.8)                         | 532 (6.0)          | 0.96 (0.85–1.09)                   | .56     |

COPD, chronic obstructive pulmonary disease; od, once daily.

# Raison des prescriptions inappropriées

A votre avis, quelles sont les raisons de ces prescriptions inappropriées?

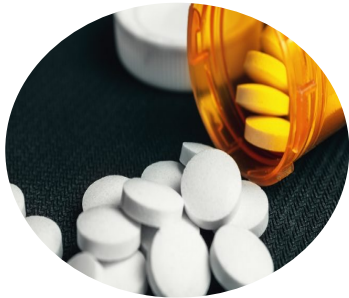

**Méconnaissance  
des indications**

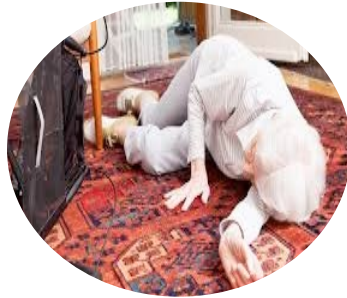

**Effet rebond**



**Non arrêt lors des transitions de soins**

**Choisissez les bonnes réponses**

**Valider**

# Raison des prescriptions inappropriées

A votre avis, quelles sont les raisons de ces prescriptions inappropriées?

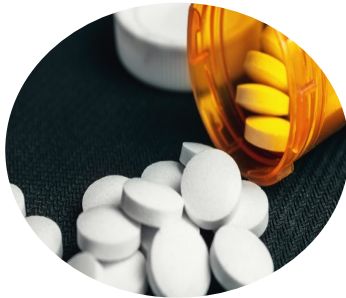

Méconnaissance  
des indications



Effet rebond



Non arrêt lors des transitions de soins

Choisissez les bonnes réponses

Valider



# 1. Mauvaise indication

**Table 1** Summary of the conclusions by Scarpignato et al. [3] regarding the appropriateness of proton pump inhibitor (PPI) therapy in 13 clinical scenarios of uncertainty and common misuse

|                                                           | Reason for use                                                                                                                                                                                                                                                                                                                                                                                                                                                                                                                                                                                                                                                                                                                                                                                                                                                                                                            |
|-----------------------------------------------------------|---------------------------------------------------------------------------------------------------------------------------------------------------------------------------------------------------------------------------------------------------------------------------------------------------------------------------------------------------------------------------------------------------------------------------------------------------------------------------------------------------------------------------------------------------------------------------------------------------------------------------------------------------------------------------------------------------------------------------------------------------------------------------------------------------------------------------------------------------------------------------------------------------------------------------|
| Long-term PPI therapy appropriate                         | <ul style="list-style-type: none"> <li>• Barrett's esophagus</li> <li>• Healing and maintenance of healed Los Angeles grade C or D erosive esophagitis<sup>a</sup></li> <li>• PPI-responsive esophageal eosinophilia</li> <li>• Idiopathic (<i>H. pylori</i> and NSAID/aspirin negative) peptic ulcer disease</li> <li>• Zollinger–Ellison disease<sup>a,b</sup></li> <li>• PPI-responsive GERD/non-erosive reflux disease<sup>a,c</sup></li> <li>• Long-term non-selective NSAID users at high-risk for upper GI complications or long-term cox-2 inhibitor users with a prior episode of GI bleeding<sup>a</sup></li> <li>• Anti-platelet therapy in patients at high-risk for upper GI complications (age &gt; 65 years or concomitant use of corticosteroids or anticoagulants or history of peptic ulcer disease)</li> <li>• Steatorrhea refractory to enzyme replacement therapy in chronic pancreatitis</li> </ul> |
| Short-term PPI therapy appropriate (4- to 12-week course) | <ul style="list-style-type: none"> <li>• Healing of Los Angeles grade A or B erosive esophagitis<sup>a</sup></li> <li>• Eosinophilic esophagitis</li> <li>• <i>H. pylori</i> eradication (in combination with antibiotics)<sup>a,d</sup></li> <li>• Stress ulcer prophylaxis in high-risk patients (i.e., critically ill patients with respiratory failure or coagulopathy)</li> <li>• Functional dyspepsia</li> <li>• Treatment and maintenance of peptic ulcer disease<sup>a</sup></li> <li>• Prior to endoscopy for acute upper GI bleeding</li> <li>• Following endoscopic treatment of a high-risk ulcer GI bleed</li> </ul>                                                                                                                                                                                                                                                                                         |
| PPI use not appropriate                                   | <ul style="list-style-type: none"> <li>• Corticosteroid users without concomitant NSAID therapy</li> <li>• To prevent bleeding from hypertensive gastropathy in cirrhotic patients</li> <li>• Acute pancreatitis</li> <li>• Stress ulcer prophylaxis in non-critically ill hospitalized patients that are not at high-risk for ulcer formation and GI bleeding</li> </ul>                                                                                                                                                                                                                                                                                                                                                                                                                                                                                                                                                 |
| PPI use of uncertain benefit                              | <ul style="list-style-type: none"> <li>• PPI non-responsive GERD</li> <li>• Extra-digestive GERD</li> </ul>                                                                                                                                                                                                                                                                                                                                                                                                                                                                                                                                                                                                                                                                                                                                                                                                               |

<sup>a</sup>FDA approved indications

<sup>b</sup>Requires 3–4 times the usual dose (PPI therapy is typically started as single dose)

<sup>c</sup>In these cases, a PPI taper should be attempted to the lowest effective dose, on demand dosing, or intermittent dosing

<sup>d</sup>In this case, a 1 to 2 week course of PPI therapy for *H. pylori* eradication in conjunction with antibiotics is appropriate  
GERD gastroesophageal reflux disease, GI gastrointestinal, NSAID non-steroidal anti-inflammatory drugs

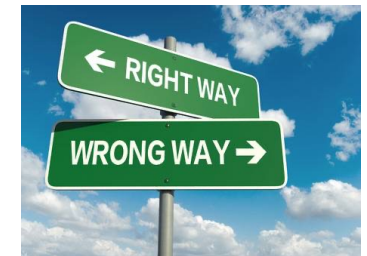

## 2. Poursuite des IPP pendant transition des soins

### RESEARCH

#### Prevalence of potentially inappropriate prescribing in older people in primary care and its association with hospital admission: longitudinal study

Teresa Pérez,<sup>1,2</sup> Frank Moriarty,<sup>2</sup> Emma Wallace,<sup>2</sup> Ronald McDowell,<sup>2,3</sup> Patrick Redmond,<sup>2,4</sup> Tom Fahey<sup>2</sup>

- 10% des admissions >65ans: effets indésirables des médicaments
- Admission à l'hôpital associée à un risque de **72 %** d'avoir une prescription inappropriée à la sortie

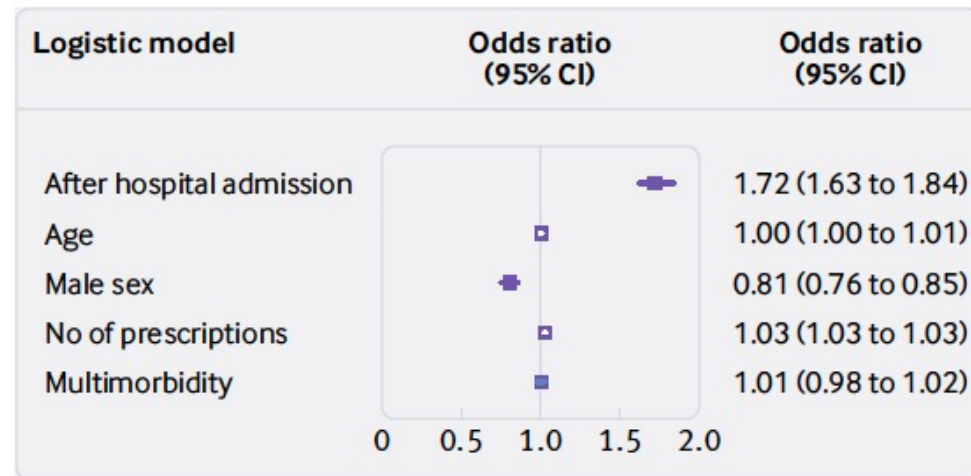

### 3. Effet de rebond

#### Proton-Pump Inhibitor Therapy Induces Acid-Related Symptoms in Healthy Volunteers After Withdrawal of Therapy

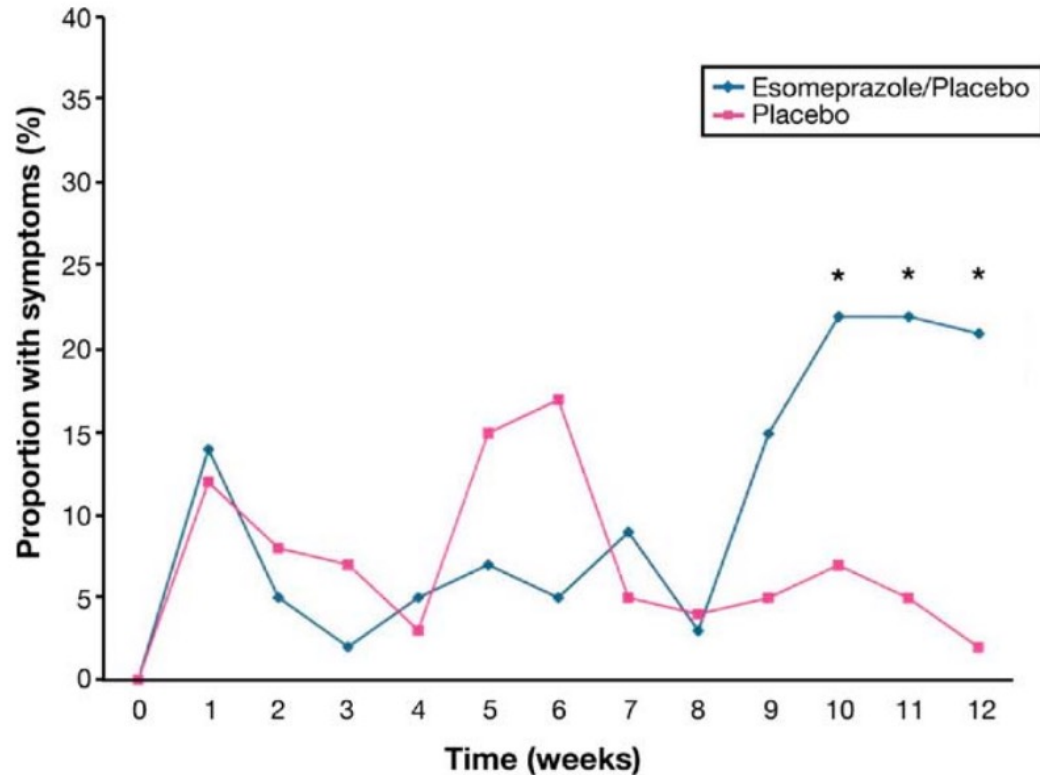

Les patients se plaignent souvent de récurrence des symptômes à l'arrêt des IPP

L'arrêt du traitement chez des volontaires sains a provoqué des symptômes de reflux

Le sevrage des IPP devrait se faire de manière progressive

# Impact Clinique et conclusion

- Les IPP font partie des médicaments les plus souvent prescrits de manière inappropriée
- Les indications aux IPP > 8sem sont rares et bien définies.
- Les IPP sont associés à des effets secondaires non négligeables telles que les colites à Clostridium
- La plus petite dose efficace doit toujours être recherchée et le sevrage devrait se faire de manière progressive pour éviter l'effet rebond

# DEPRESCRIPTION

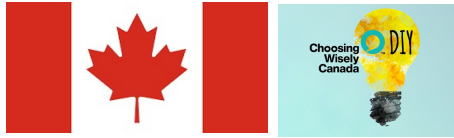

**Don't maintain long-term Proton Pump Inhibitor (PPI) therapy for gastrointestinal symptoms without an attempt to stop / reduce PPI at least once per year in most patients.**

Walsh K, et al. Deprescribing in a Family Health Team:. J Prim Health Care. 2016

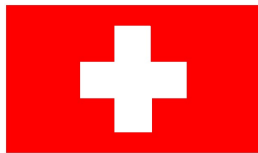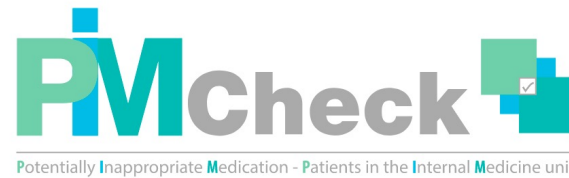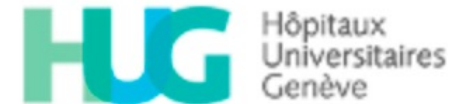

<https://www.pimcheck.org/en/presentation.php>



# Campagne publicitaire « Choosing wisely » pour éviter la prescription inappropriée de IPP

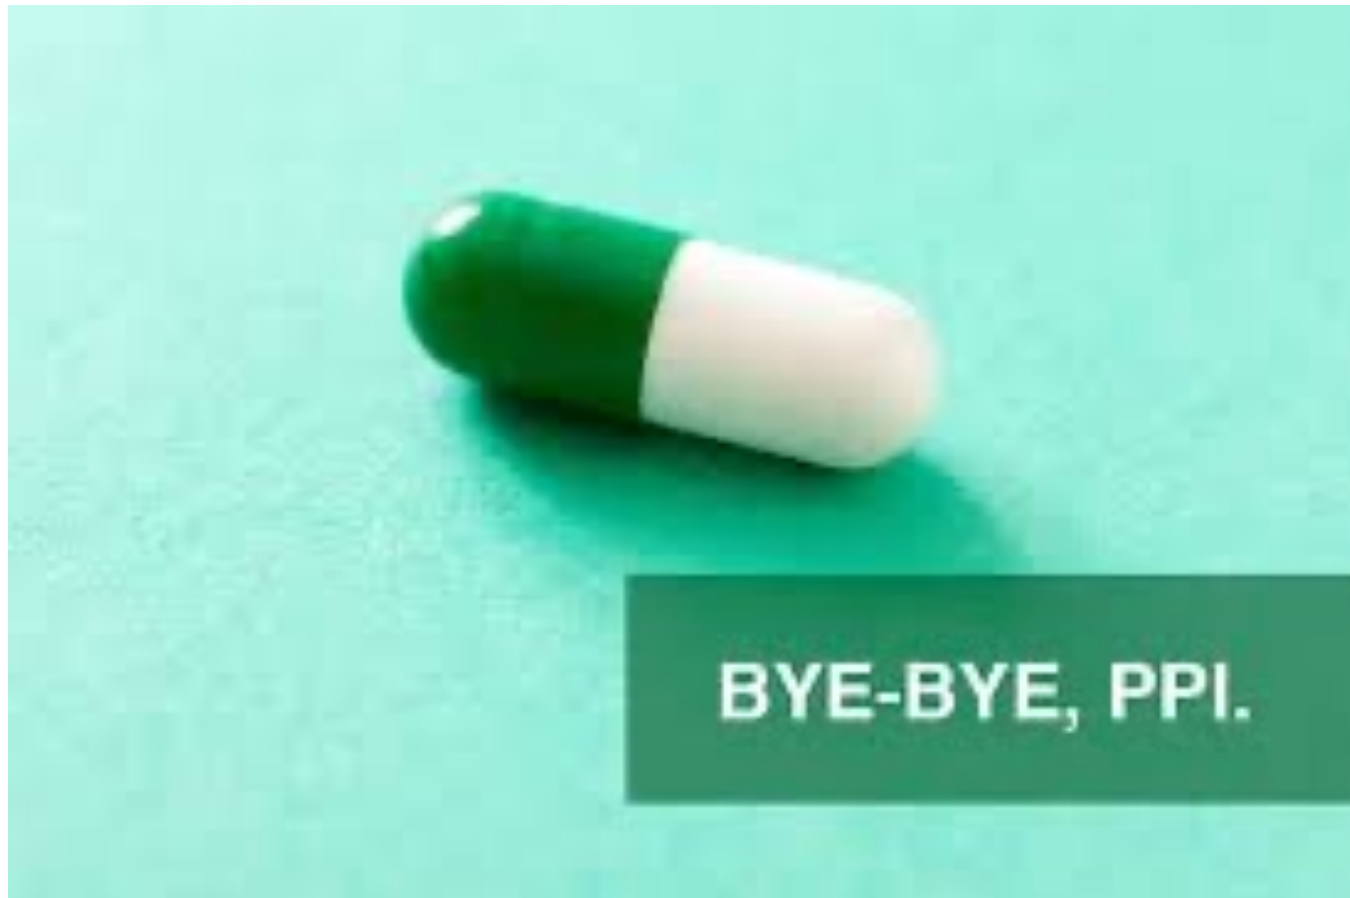

**Toujours diminuer à la plus petite dose efficace**
