# Supplementary figures and images for: Implementing a Multifaceted Intervention among Internal Medicine Residents with Audit and Educative Data Feedback Significantly Reduces Low-Value Care in Hospitalized Patients
Source: MDPI journal article supplement (doi:10.3390/jcm11092435), 2022-04-26

Prescription rates of proton pump inhibitors treatment

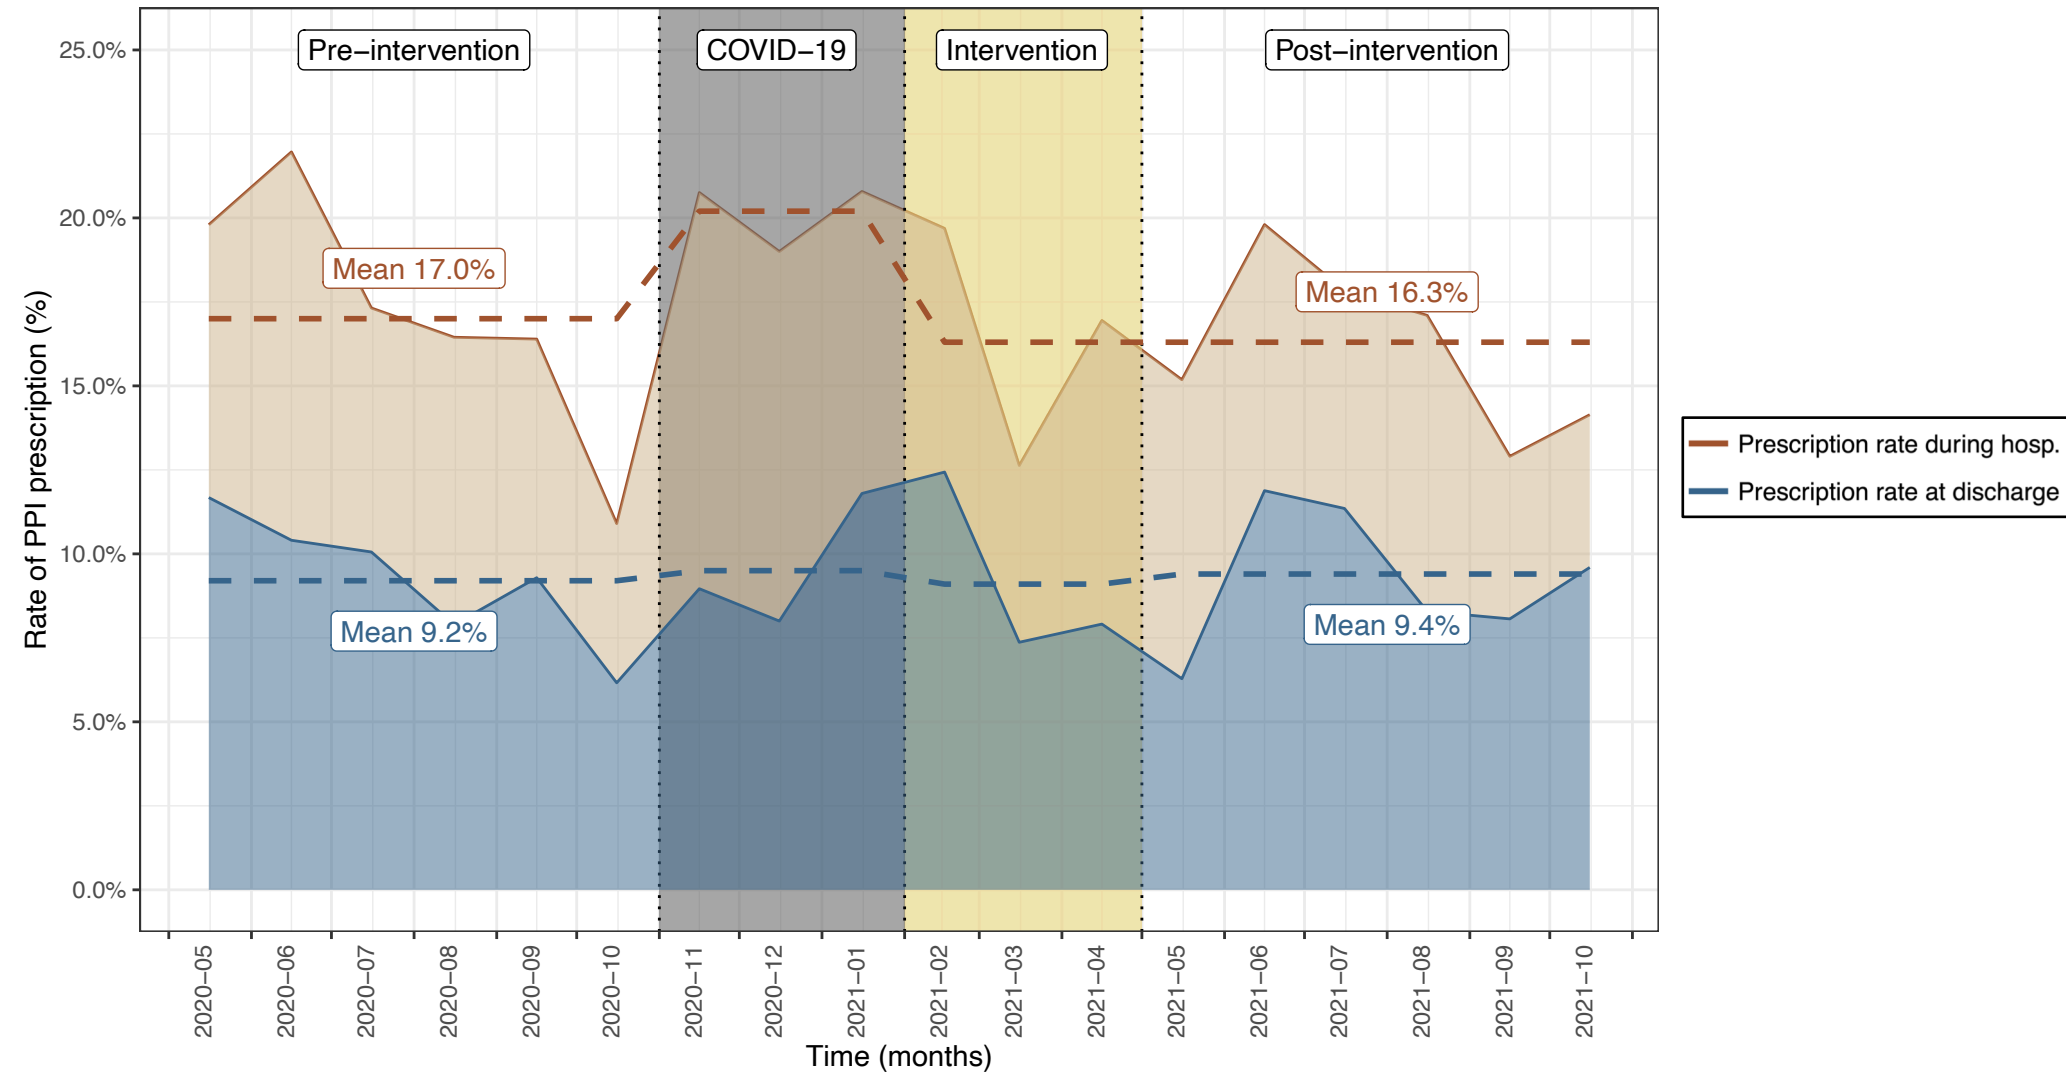

Supplement: s1 [file s1]
